# Supplementary material
Source: Research Square preprint supplement (doi:10.21203/rs.3.rs-8668372/v1)
Supplement: Supplementary file 1 [file 8de4c40bacbaa5fc7ad3546b.docx]

**Supplementary Material**


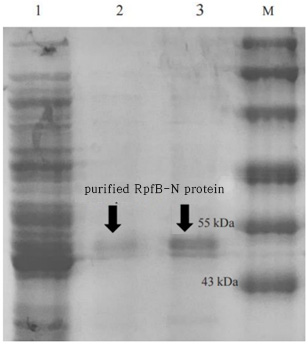


Figure S1. RpfB Purified Protein

M: Protein Marker, 1: RpfB crude protein, 2 : RpfB protein eluted with 10 mM imidazole buffer, 3: Purified RpfB protein eluted with 50 mM imidazole buffer

Table S1. Protein and polysaccharide contents of *N. antarcticus*

| **Classification** | **culture supernatant** | **High-molecular solution** | **Low-molecular solution** |
| --- | --- | --- | --- |
| protein concentration (mg/mL) | 0.798 | 4.480 | 0.315 |
| polysaccharide concentration (mg/mL) | 2.51 | 11.09 | 0.22 |


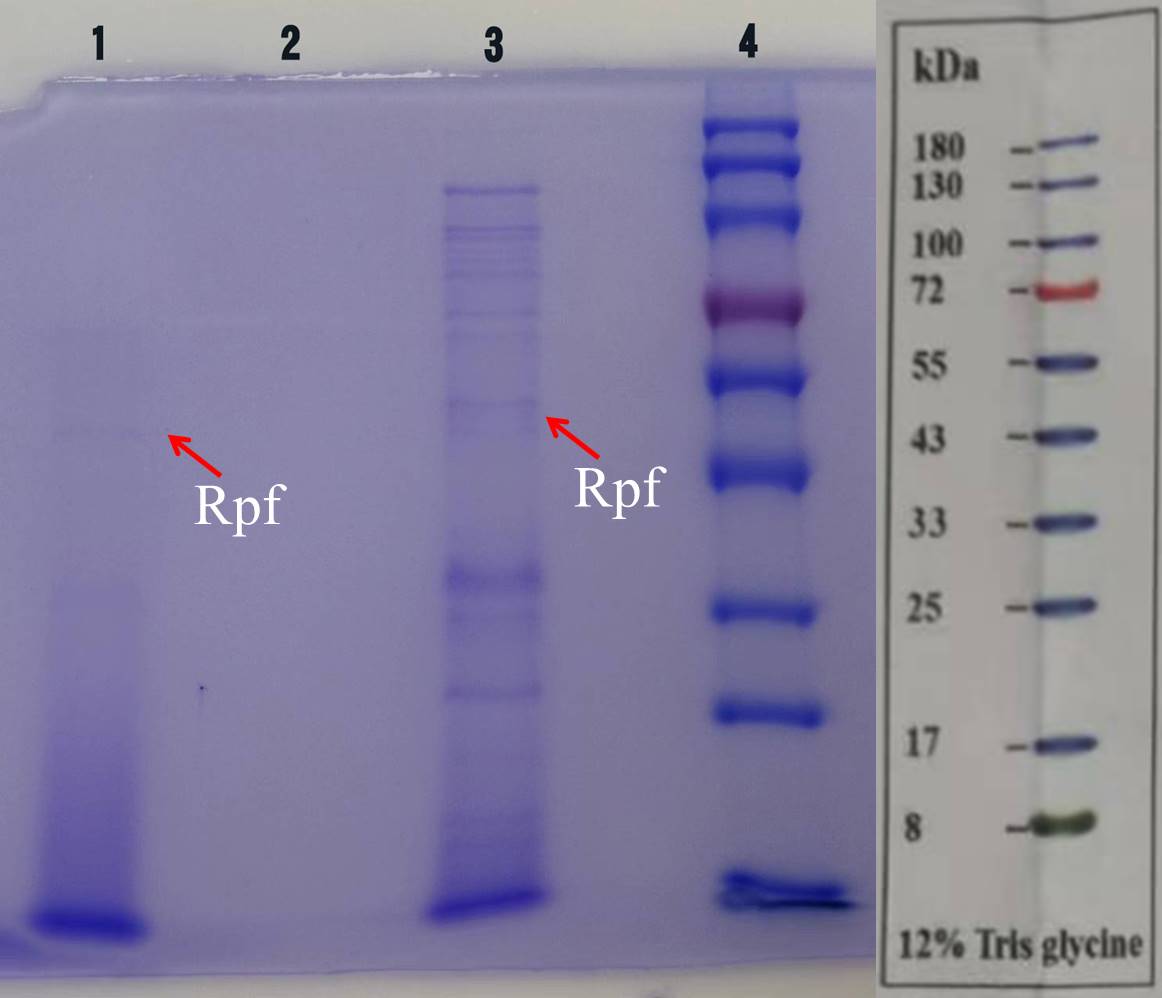
.

Figure S2 : SDS-PAGE protein electrophoresis of culture supernatant of *N. antarcticus*

1: culture supernatant, 2: low-molecular solution, 3: high-molecular solution, 4: Protein Marker

Table S2. Absorbance (OD600) of dilution series of soil samples.

| **Dilution series**  **Absorbance** | | **10-5** | **10-6** | **10-7** | **10-8** | **10-9** | **10-10** | **10-11** | **10-12** |
| --- | --- | --- | --- | --- | --- | --- | --- | --- | --- |
| OD600 | 1 | 0.594 | 0.610 | 0.621 | 0.584 | 0.045 | 0.046 | 0.045 | 0.045 |
| 2 | 0.508 | 0.532 | 0.543 | 0.647 | 0.045 | 0.045 | 0.046 | 0.045 |
| 3 | 0.553 | 0.526 | 0.527 | 0.564 | 0.594 | 0.045 | 0.045 | 0.045 |
| control | | 0.046 | 0.045 | 0.045 | 0.046 | 0.047 | 0.045 | 0.046 | 0.045 |

R2A liquit medium, 20℃, 7d thermostatic shaking culture


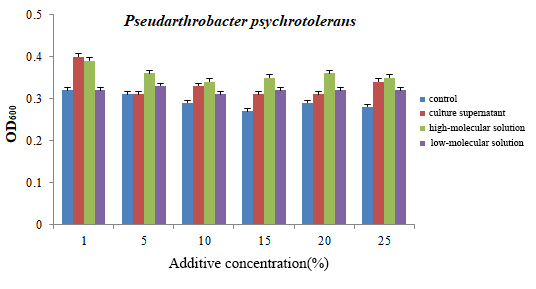


Figure S3. Effect of *N. antarcticus* culture supernatant on the growth of *P. psychrotolerans*


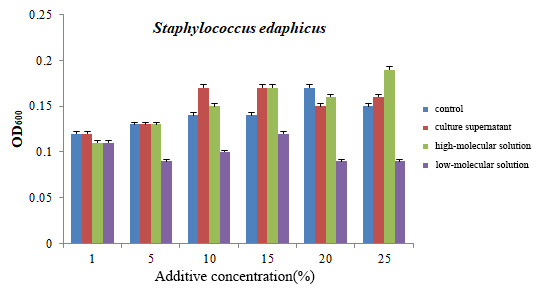


Figure S4. Effect of *N. antarcticus* culture supernatant on the growth of *S. edaphicus*

Table S3. Bacterial diversity index of soil samples treated with *N. antarcticus* culture supernatant

| **Classification** | **OUT**  **(number)** | **Shannon** | **Simpson** | **Sobs** | **Coverage** |
| --- | --- | --- | --- | --- | --- |
| control | 5078 | 6.2145 | 0.0072 | 4128.3478 | 0.9824 |
| culture supernatant | 6656 | 6.4734 | 0.0058 | 4924.2865 | 0.9831 |
| high-molecular solution | 7098 | 6.7648 | 0.0041 | 5186.3642 | 0.9835 |
| low-molecular solution | 4863 | 6.1456 | 0.0076 | 4036.6824 | 0.9823 |
